# Supplementary material for: Quantum biological tunnel junction for electron transfer imaging in live cells
Source: PubMed Central journal article supplement (PMC6642182; doi:10.1038/s41467-019-11212-x), 2019-07-19
Supplement: 41467_2019_11212_MOESM2_ESM.pdf [file 41467_2019_11212_MOESM2_ESM.pdf]

## Description of Additional Supplementary Files

File Name: Supplementary Movie 1

Description: HeLa cell with GNP uptake. Organelles and GNPs inside the cell as well as their movement can be clearly seen.
